# Supplementary material for: miR-221/222 Targets Adiponectin Receptor 1 to Promote the Epithelial-to-Mesenchymal Transition in Breast Cancer
Source: PubMed Central journal article supplement (PMC3679042; doi:10.1371/journal.pone.0066502), 2013-06-11

### Dharmacon ADIPOR1 siRNAs

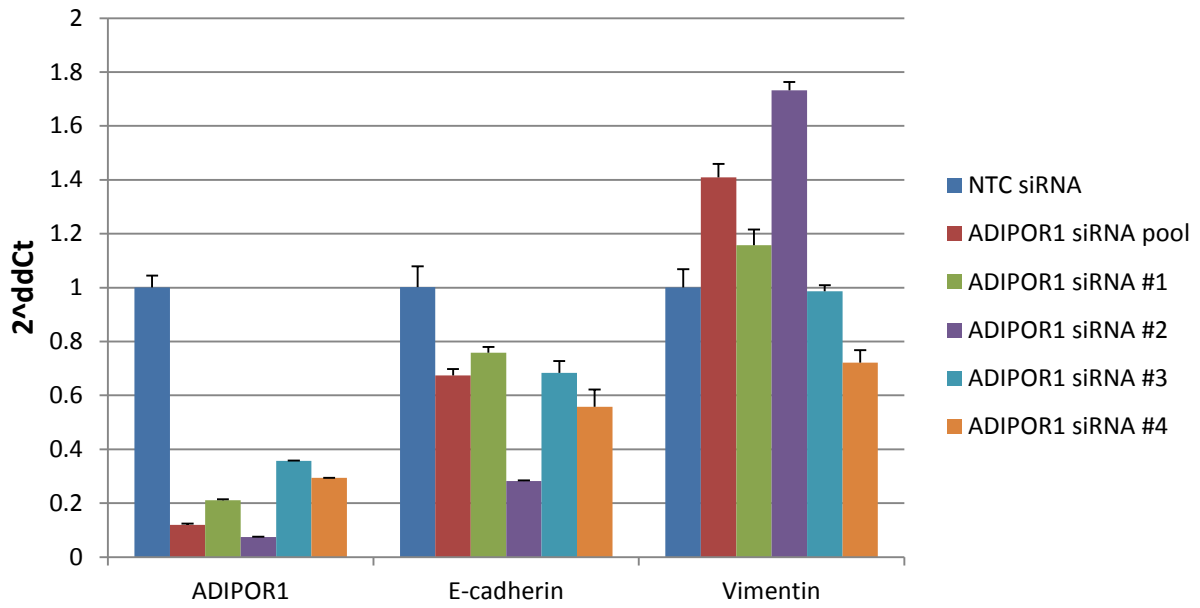

### Qiagen ADIPOR1 siRNAs

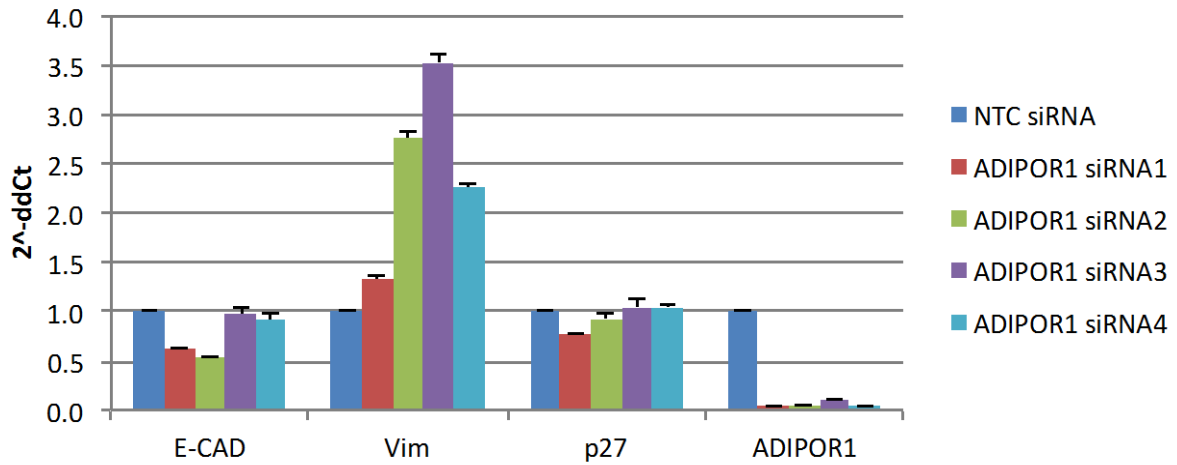

Supplement: pone.0066502.s001.pdf [file pone.0066502.s001.pdf]
