# Supplementary material for: miR-221/222 Targets Adiponectin Receptor 1 to Promote the Epithelial-to-Mesenchymal Transition in Breast Cancer
Source: PubMed Central journal article supplement (PMC3679042; doi:10.1371/journal.pone.0066502), 2013-06-11
Supplement: pone.0066502.s002.pdf [file pone.0066502.s002.pdf]

## STR Profiles for Cell Lines Used

| CLID   | Cell Line Name | cName      | D3S1358 | TH01   | D21S11 | D18S51 | Penta E | D5S818 | D13S317 | D7S820 | D16S539 | CSF1PO | Penta D | AMEL | vWA    | D8S1179 | TPOX  | FGA    |
|--------|----------------|------------|---------|--------|--------|--------|---------|--------|---------|--------|---------|--------|---------|------|--------|---------|-------|--------|
| 131434 | MCF 10A        | MCF 10A    | 14, 18  | 8, 9.3 | 28, 30 | 18, 19 | 13, 14  | 10, 13 | 8, 9    | 10, 11 | 11, 12  | 10, 12 | 10, 12  | X    | 15, 17 | 14, 16  | 9, 11 | 22, 24 |
| 583925 | MDA-MB-231     | MDA-MB-231 | 16      | 7, 9.3 | 33.2   | 11, 16 | 11      | 12     | 13      | 8, 9   | 12      | 12, 13 | 11, 14  | X    | 15, 18 | 13      | 8, 9  | 22, 23 |
